# Supplementary material
Source: MDPI journal article supplement (https://www.mdpi.com/2072-4292/9/5/442)
Supplement: s1 [file s1]

Article

# Supplementary Materials

Pablo Sánchez-Gómez <sup>1</sup>, and Francisco J. Navarro <sup>1</sup>

<sup>1</sup> Departamento de Matemática Aplicada a las TIC ; pablo.sgamez@upm.es

Academic Editor: name

Version May 5, 2017 submitted to Remote Sens.

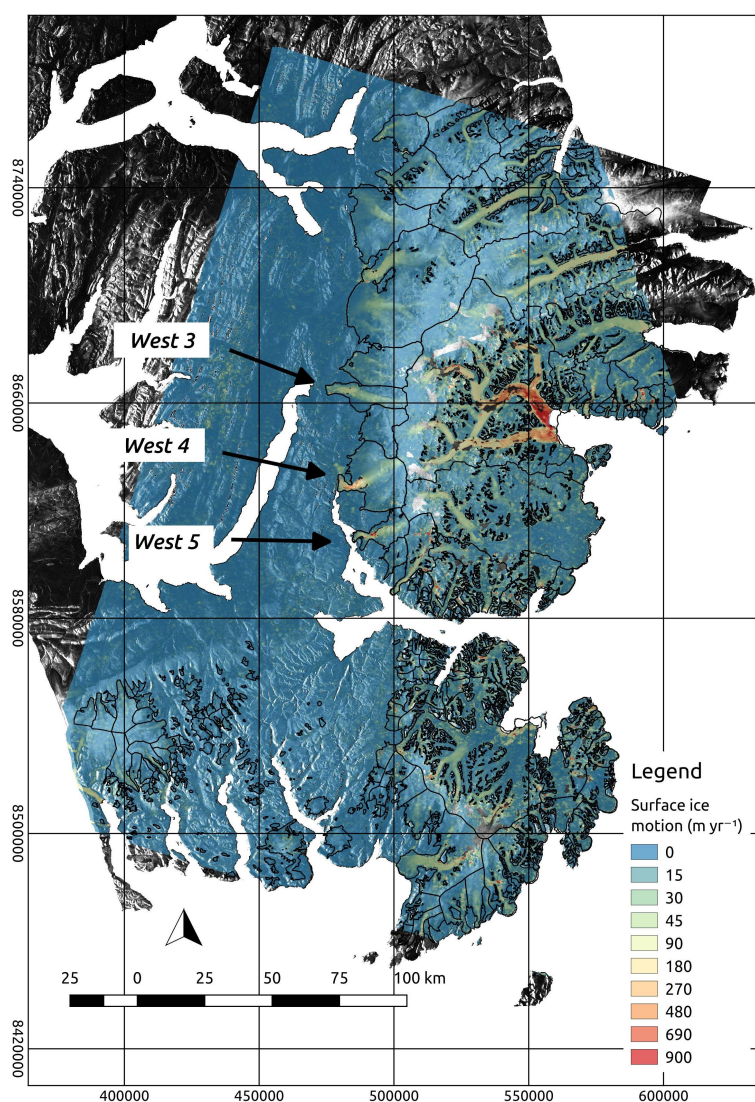

**Figure S 1.** Ice velocities using offset tracking for southern Ellesmere Ice Caps. Velocity map overlaid on top of Sentinel-1 SAR images. Velocities calculated from images acquired between the 22nd and 12th of March 2016. Background images acquired between the 22nd and 29th of February 2016.

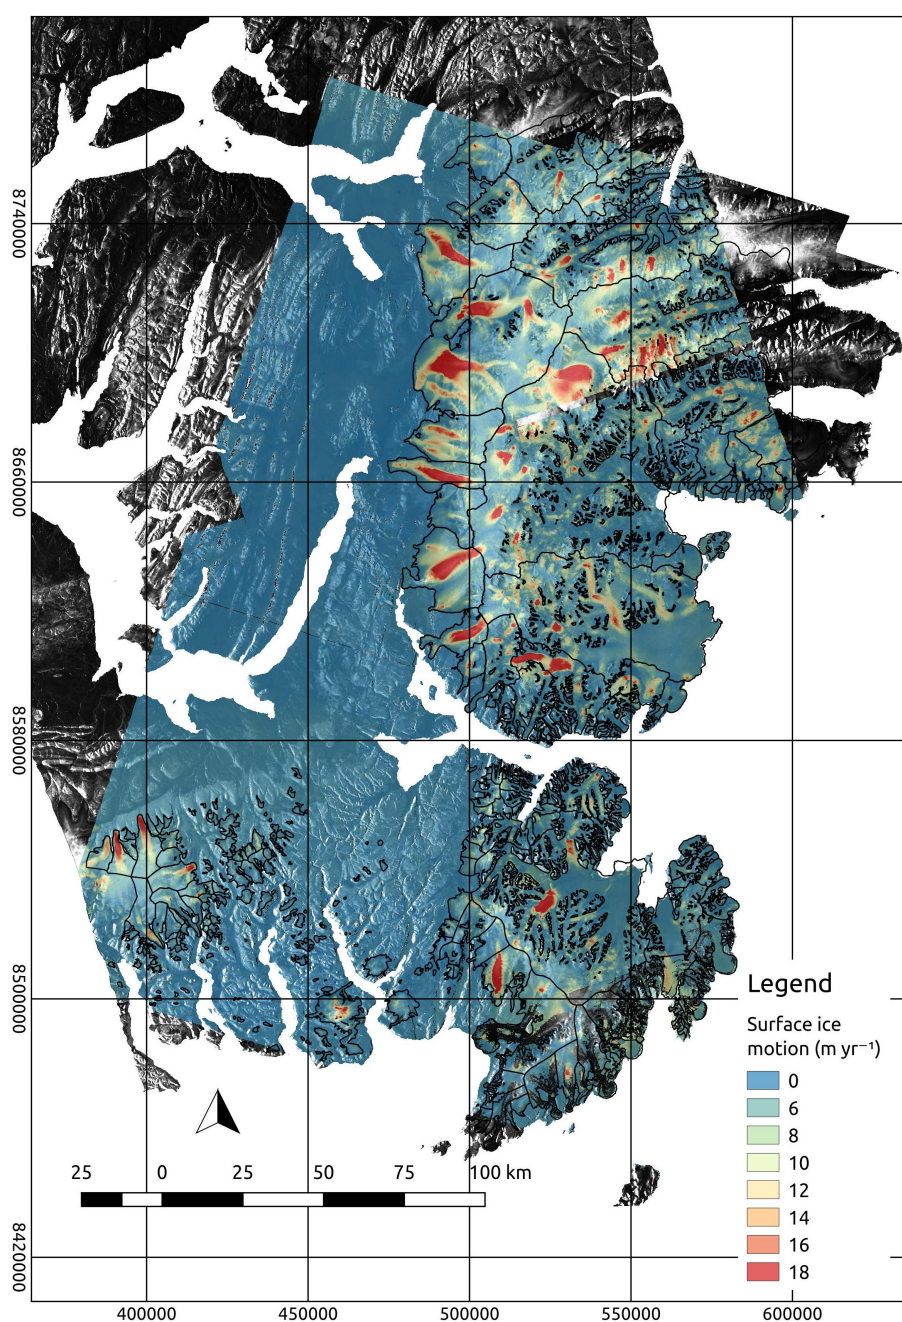

**Figure S 2.** Ice velocities using D-InSAR for southern Ellesmere Ice Caps. Velocity map overlaid on top of Sentinel-1 SAR images. Velocities calculated from images acquired between the 10th and 29th of March 2016. Background images acquired between the 22nd and 29th of February 2016.

1     © 2017 by the authors. Submitted to *Remote Sens.* for possible open access publication  
 2     under the terms and conditions of the Creative Commons Attribution (CC-BY) license  
 3     (<http://creativecommons.org/licenses/by/4.0/>).
